# Supplementary material
Source: Royal Society of Chemistry journal article supplement (doi:10.1039/d6cp00272b)
Supplement: d6cp00272b1.pdf [file d6cp00272b1.pdf]

Supplementary Information for  
**Work function-regulated two-dimensional porous C<sub>7</sub>N<sub>6</sub>-based  
single-atom catalysts for hydrogen evolution reaction**

Wenli Xie<sup>a</sup>, Bin Cui<sup>b</sup>, Desheng Liu<sup>b</sup>, Haicai Huang<sup>c\*</sup>, Chuanlu Yang<sup>d\*</sup>

<sup>a</sup> *School of Materials Science and Engineering, Guangdong Ocean University, Yangjiang 529500, China.*

<sup>b</sup> *School of Physics, State Key Laboratory of Crystal Materials, Shandong University, Jinan 250100, China.*

<sup>c</sup> *Chongqing School, University of Chinese Academy of Sciences, Chongqing 400714, China.*

<sup>d</sup> *School of Physics and Optoelectronic Engineering, Ludong University, Yantai 264025, China.*

---

\*Corresponding author.

*E-mail address: huanghaicai@cigit.ac.cn; ycl@ldu.edu.cn.*

To better evaluate the interaction strength between transition metal (TM) and support, the adsorption energies of different TM atoms anchor on C<sub>7</sub>N<sub>6</sub> monolayer (TM@C<sub>7</sub>N<sub>6</sub>) were calculated, as the following formula:

$$E_{\text{ad}} = E_{\text{total}} - (E_{\text{sub}} + E_{\text{TM}})$$

where  $E_{\text{total}}$  represents the total energy of the system,  $E_{\text{sub}}$  denotes the energy of the substrate, and  $E_{\text{TM}}$  corresponds to the energy of the adsorbed TM atom. This definition implies that a more negative value of  $E_{\text{ad}}$  indicates a more stable adsorption structure.

To examine the electrochemical stability of TM@C<sub>7</sub>N<sub>6</sub>, the dissociation potential ( $U_{\text{diss}}$ ) was calculated:

$$U_{\text{diss}} = U_{\text{diss}}^0 - \frac{E_{\text{f}}}{Ne}$$

where  $U_{\text{diss}}^0$  and  $N$  represent the standard dissolution potential of elements in their bulk structure and the number of electrons involved in the dissolution process, respectively.

Additionally, to evaluate the catalytic activity of HER process, Gibbs free energy of H adsorption ( $\Delta G_{\text{H}^*}$ ) was calculated based on computational hydrogen electrode (CHE) model, as shown in the following formula:

$$\Delta G = \Delta E_{\text{DFT}} + \Delta E_{\text{ZPE}} - T\Delta S$$

where  $\Delta E_{\text{DFT}}$ ,  $\Delta E_{\text{ZPE}}$ , and  $\Delta S$  represent the adsorption energy of intermediates, change in zero-point energy, and entropy, respectively.

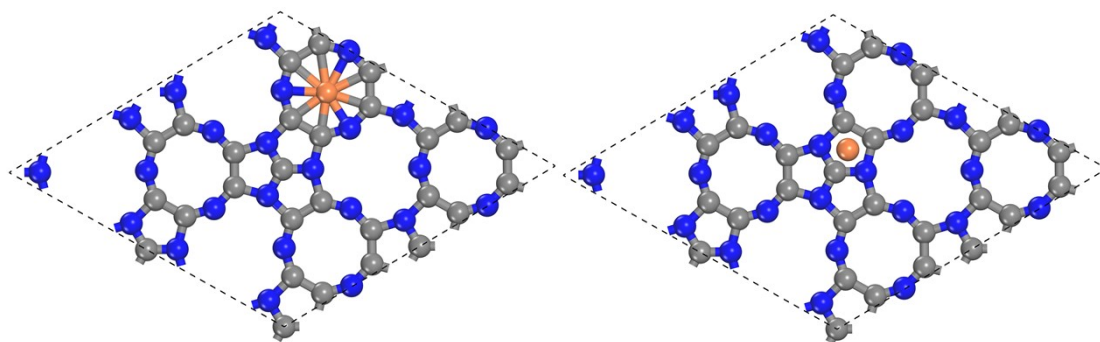

**Fig. S1** Geometry structures of TM supported on  $C_7N_6$  in (a)  $C_6N_3$  centers and (b) pentagonal core. The grey, blue, and orange spheres represent C, N and TM elements, respectively.

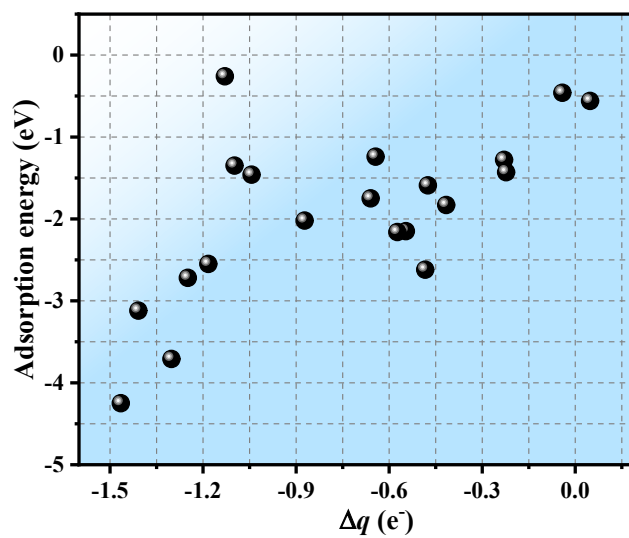

**Fig. S2** Scaling relationship between the charge transfer quantity ( $\Delta q$ ) and adsorption energy ( $E_{ad}$ ) of TMs.

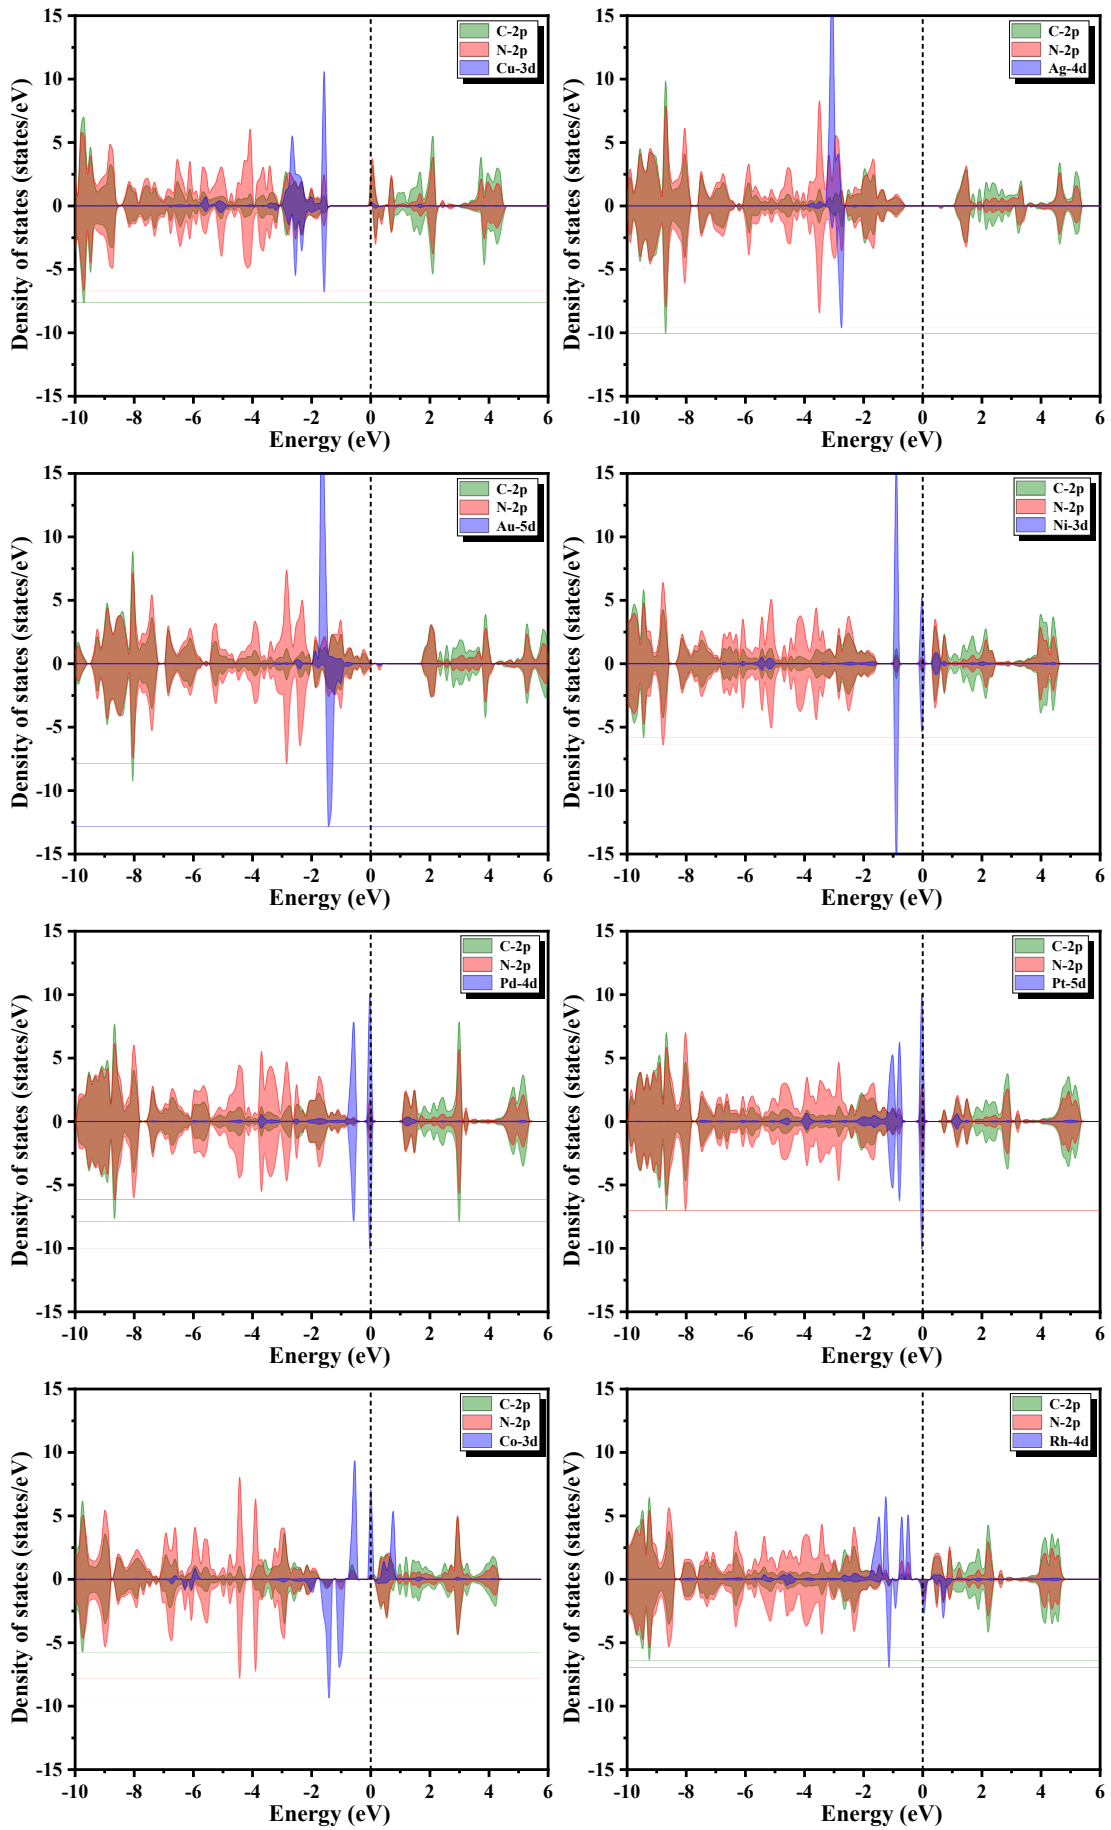

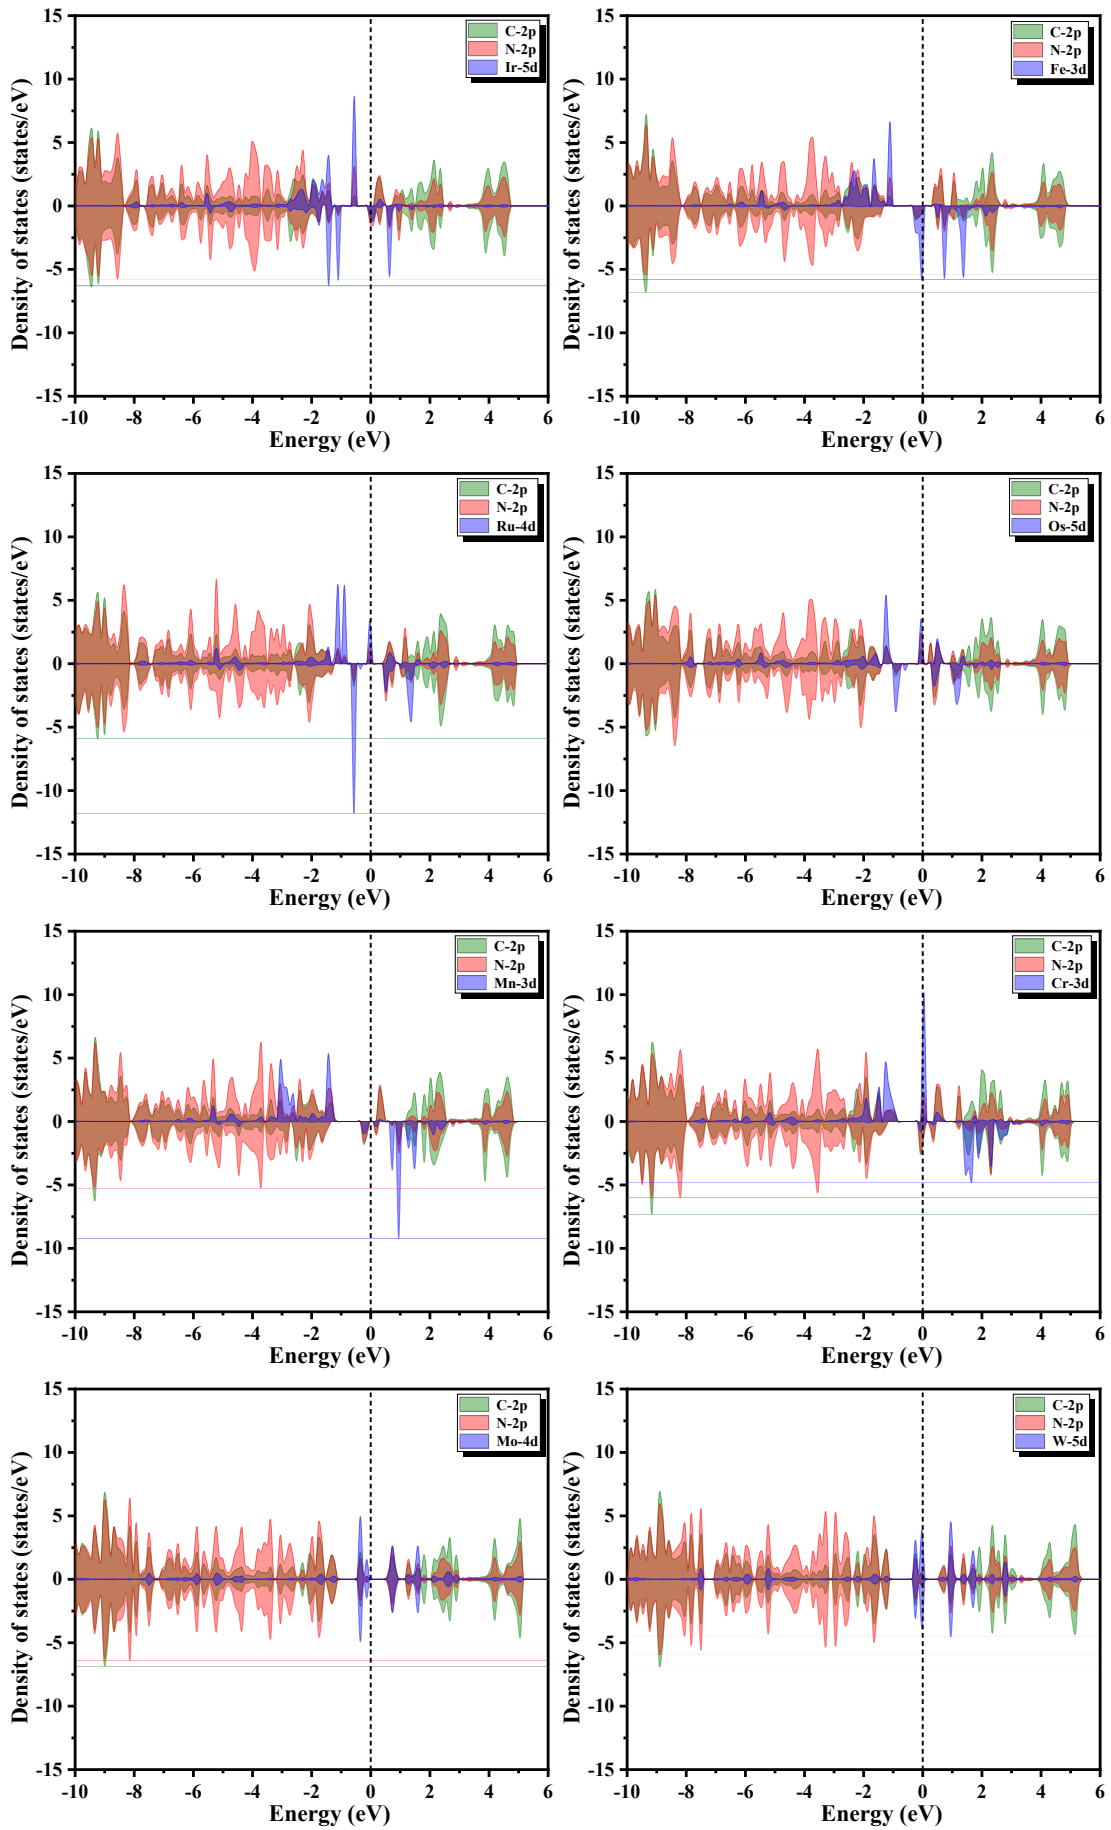

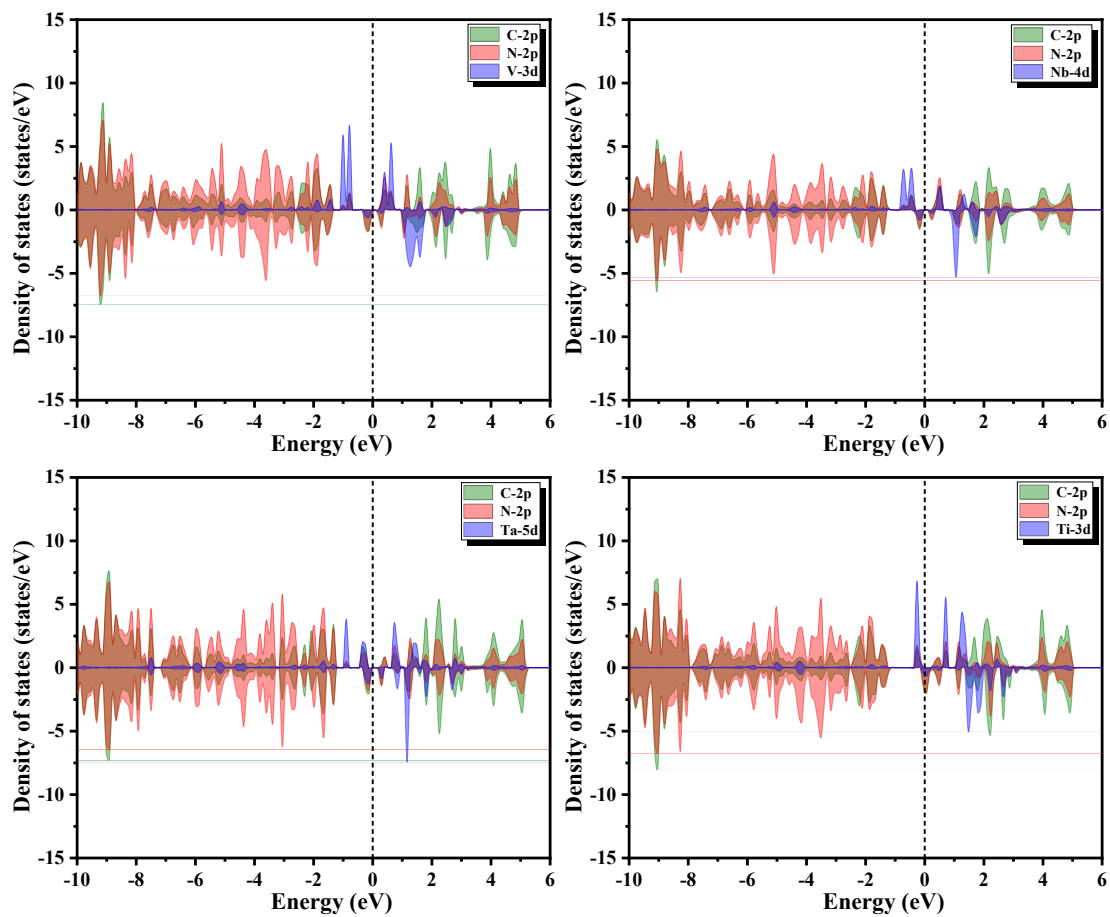

**Fig. S3** Density of states of TM@C<sub>7</sub>N<sub>6</sub>.

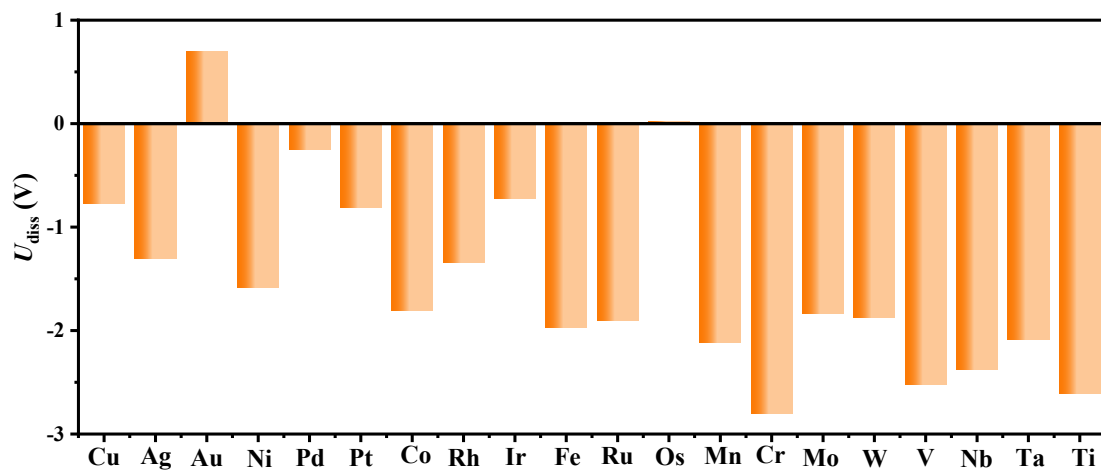

**Fig. S4** Dissolution potential of TM@C<sub>7</sub>N<sub>6</sub>.

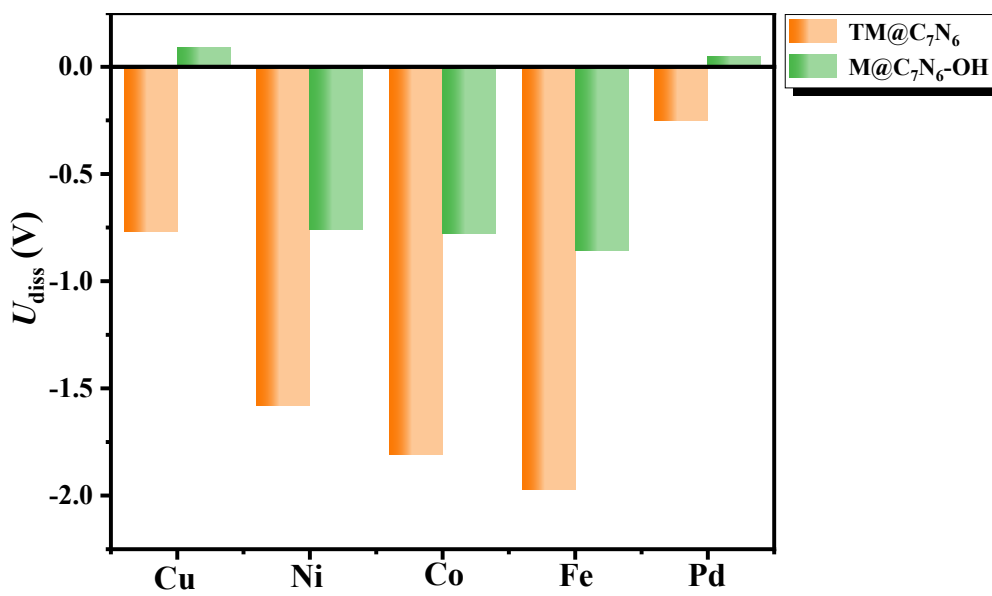

**Fig. S5** Comparison of dissolution potential between TM@C<sub>7</sub>N<sub>6</sub> between TM@C<sub>7</sub>N<sub>6</sub>-OH.

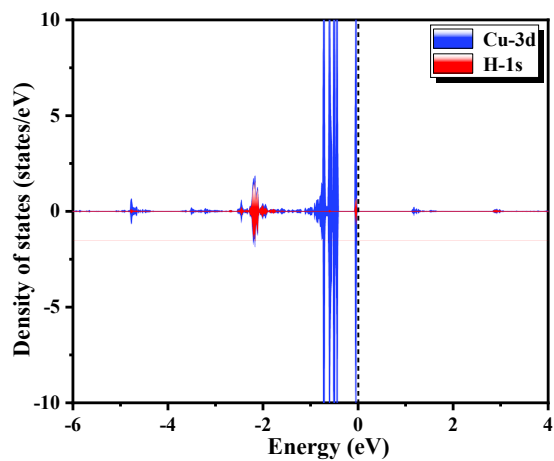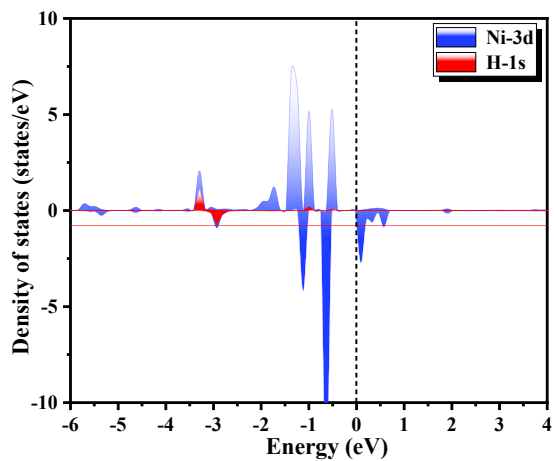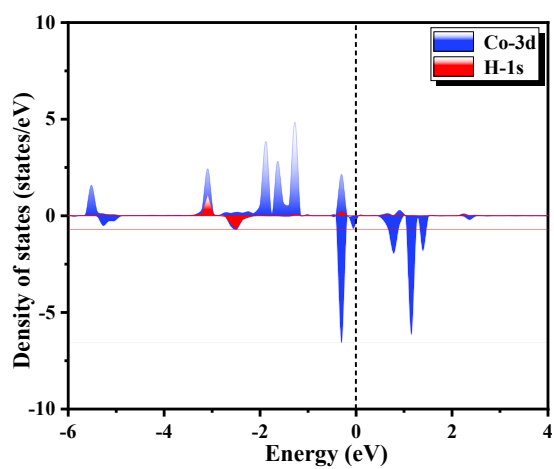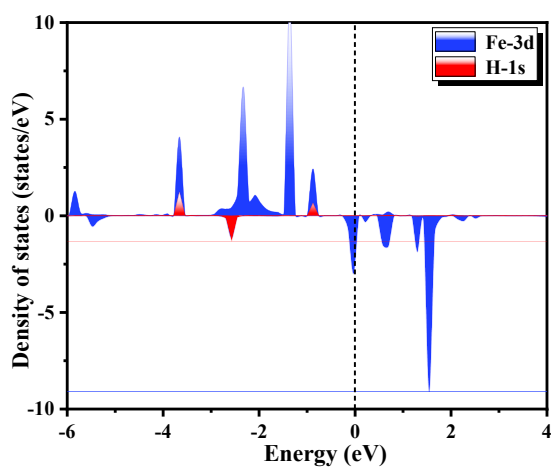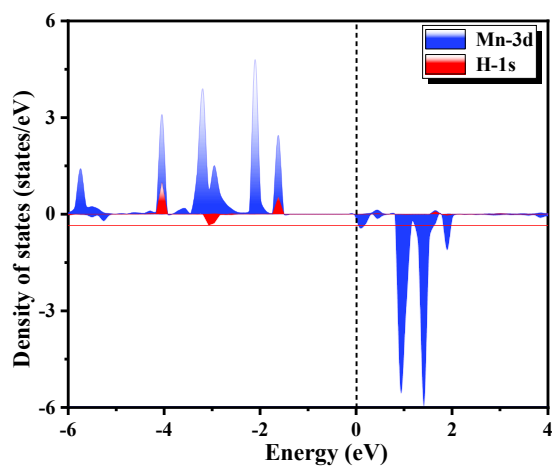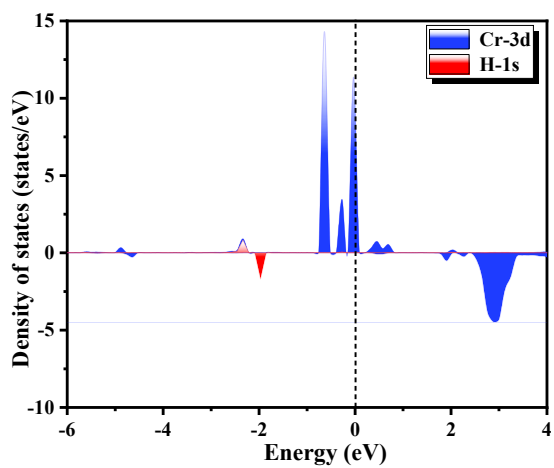

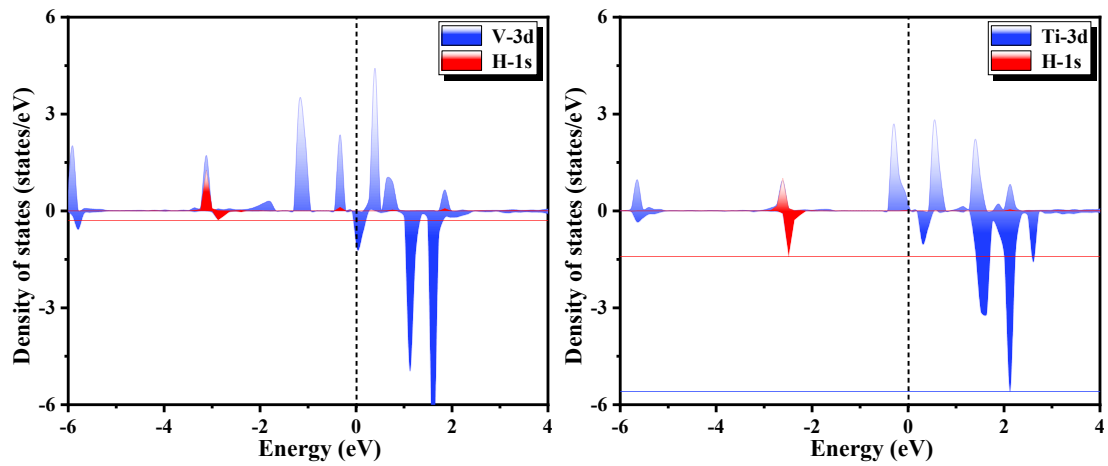

**Fig. S6** Projected density of states of H adsorption on  $\text{TM}@C_7N_6$ .

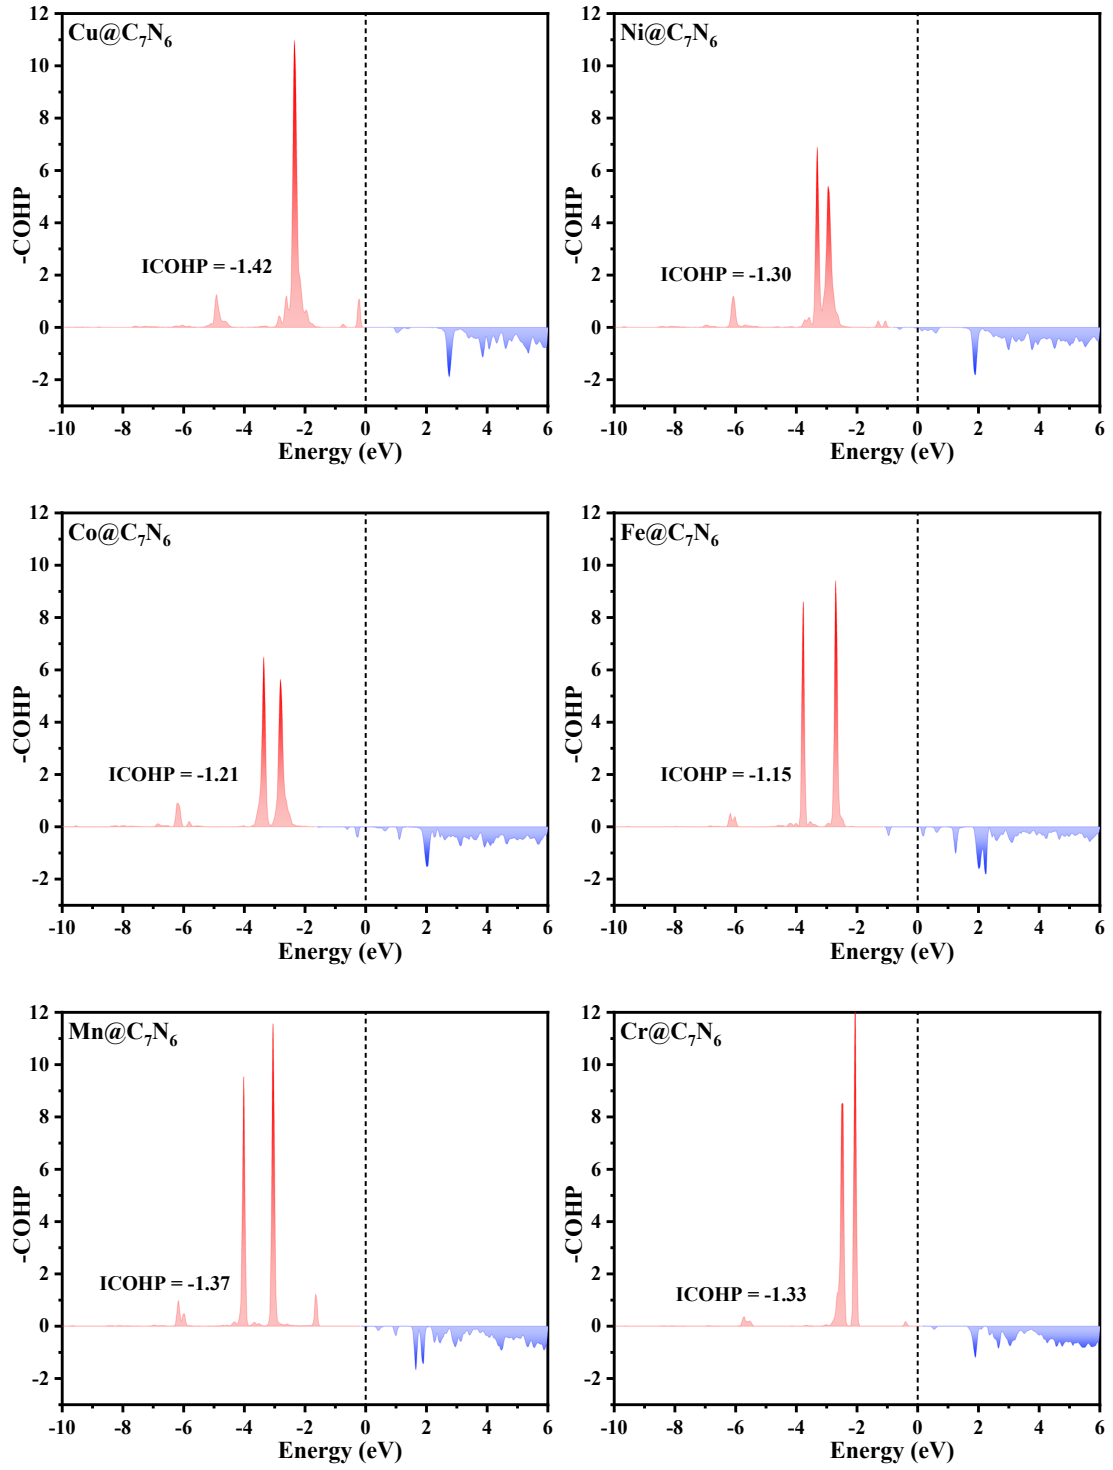

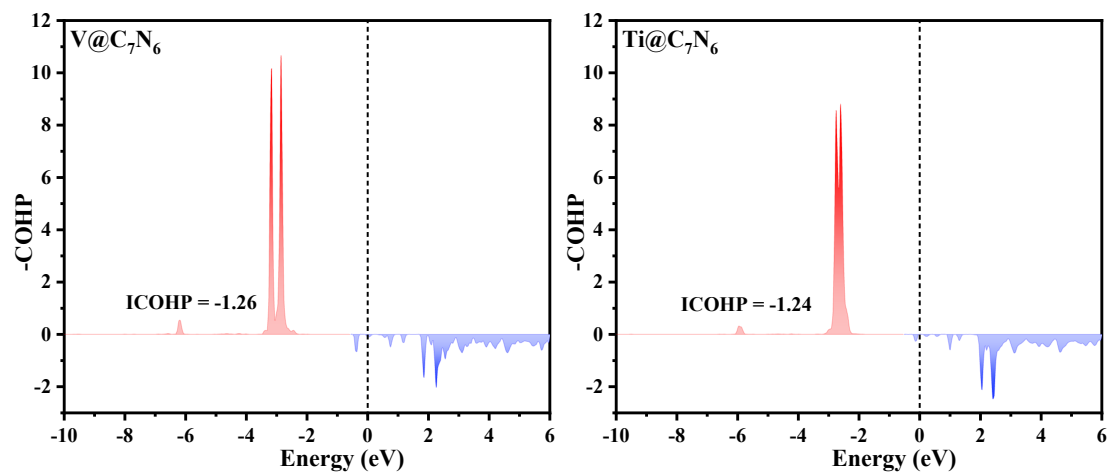

**Fig. S7** Projected crystal orbital Hamiltonian population (pCOHP) of H adsorption on  $TM@C_7N_6$ .

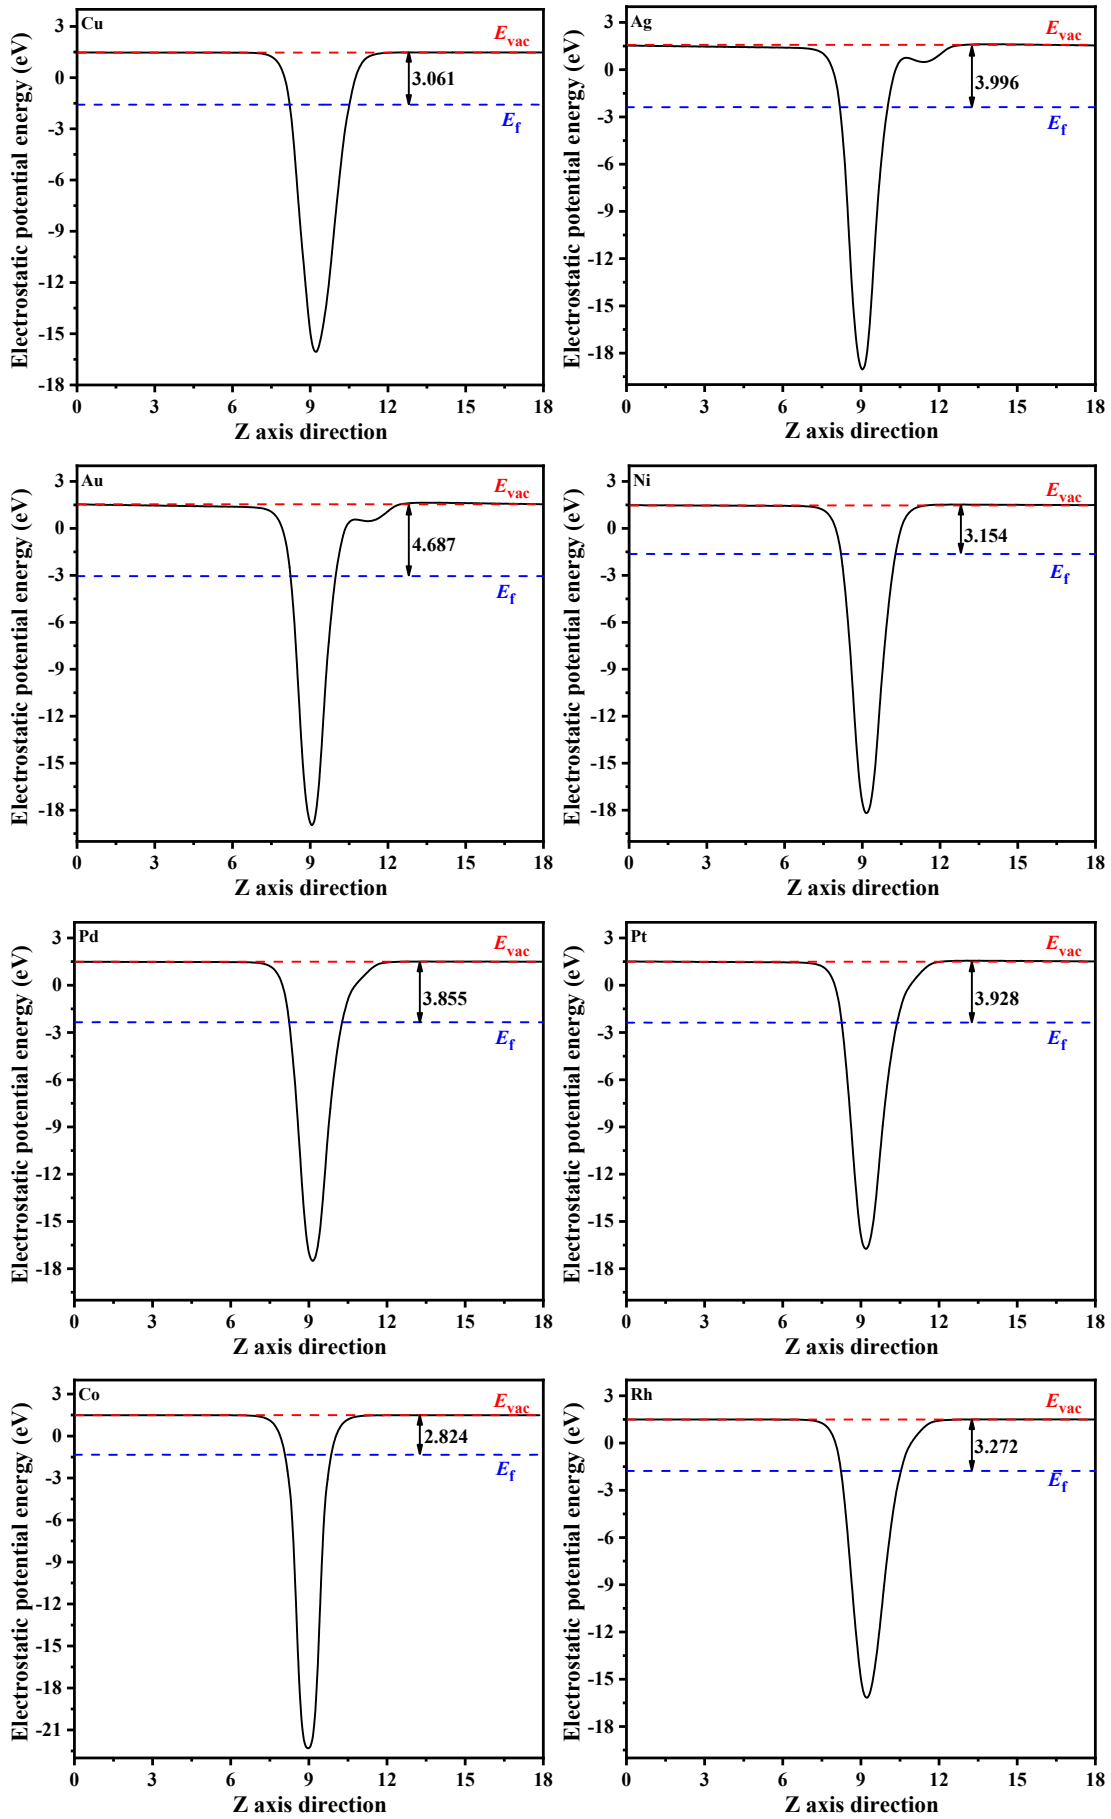

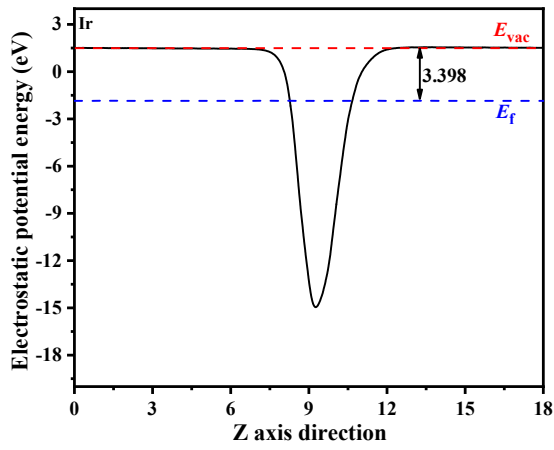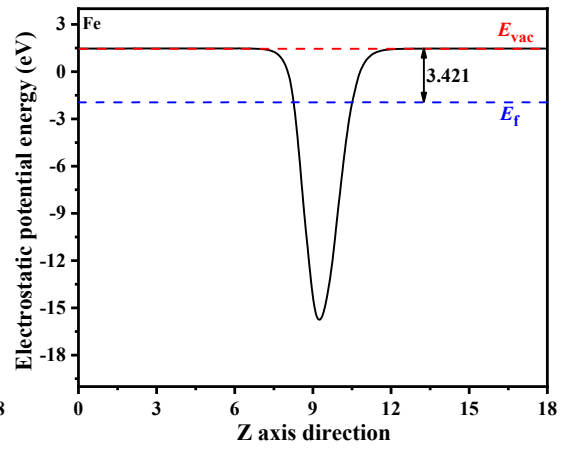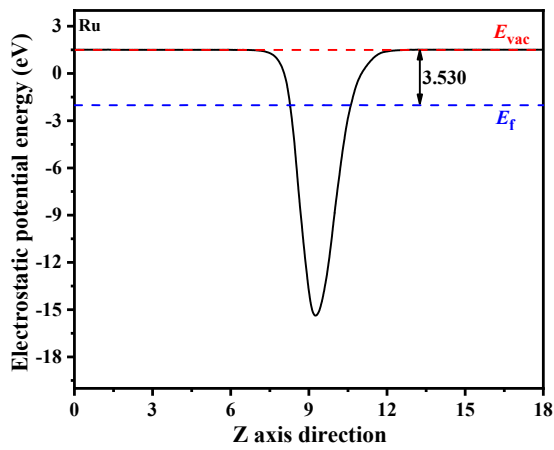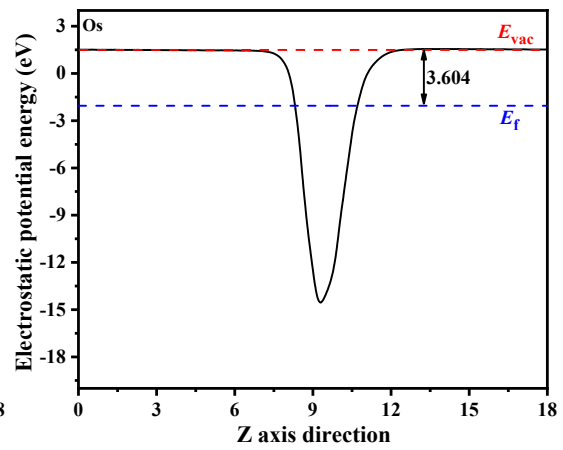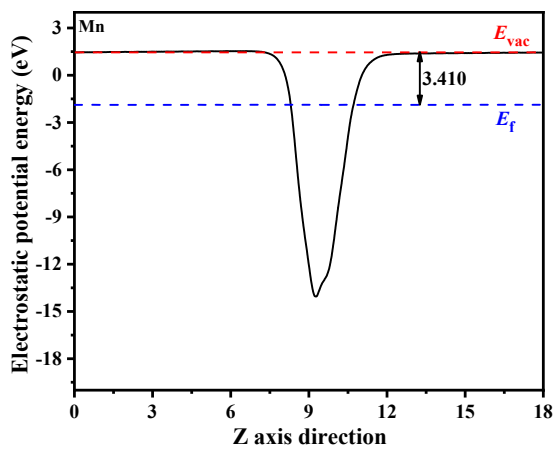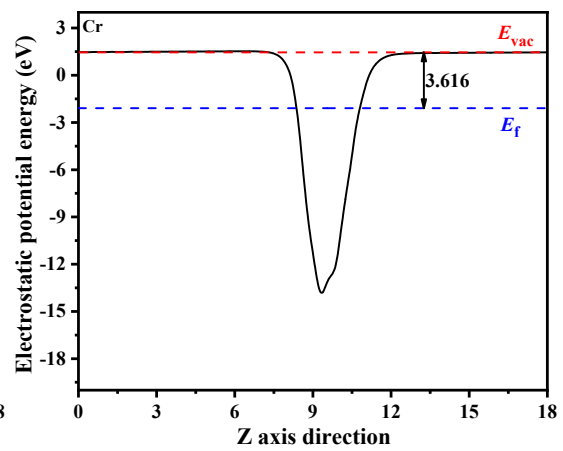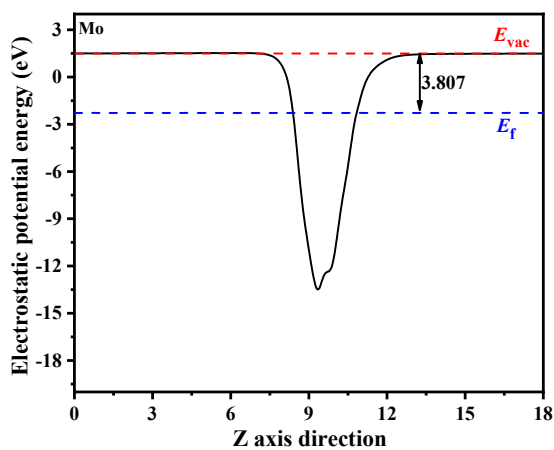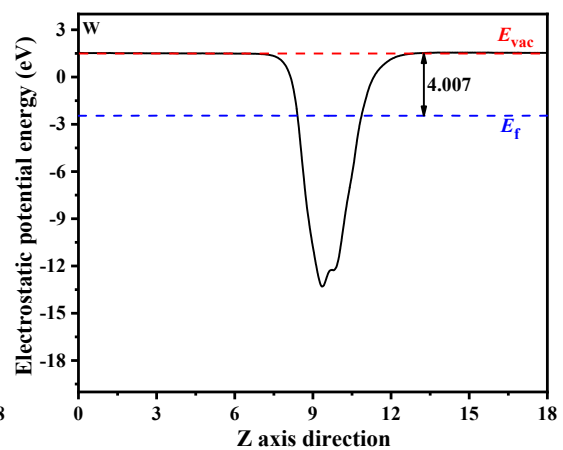

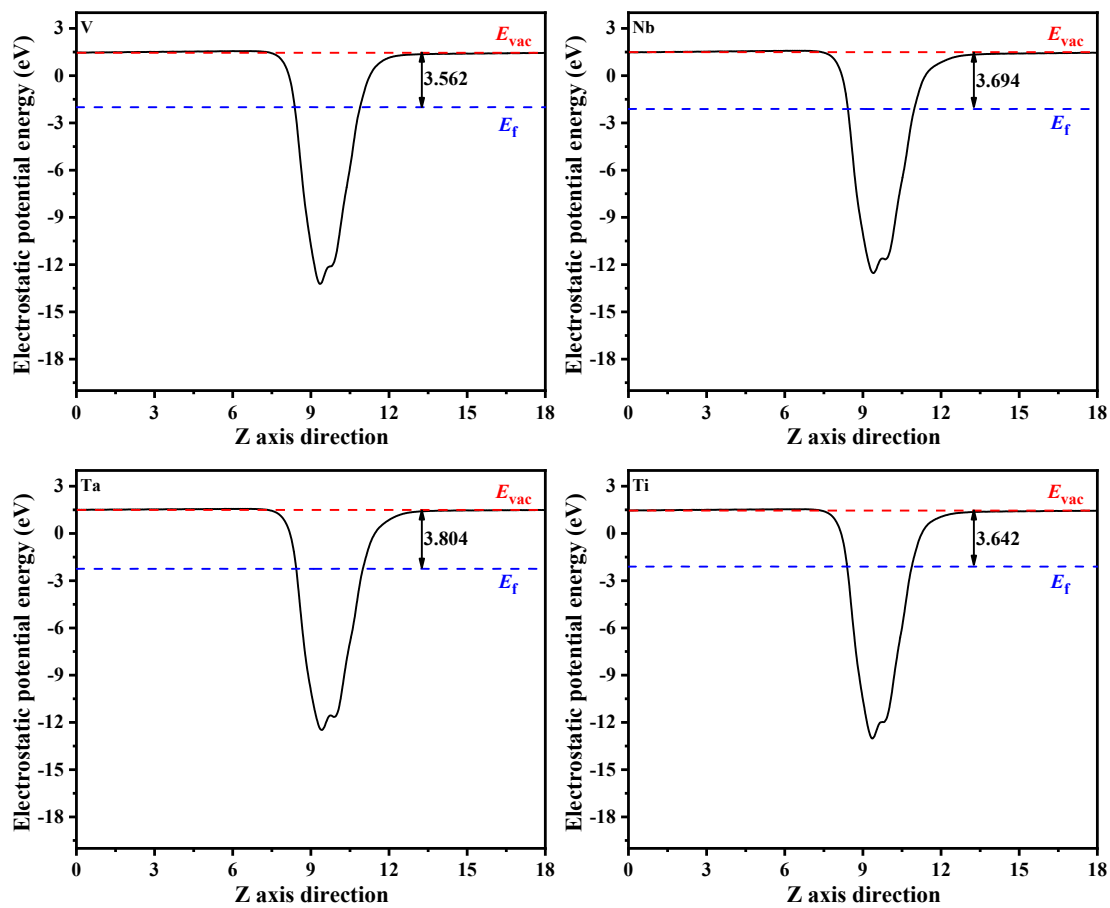

**Fig. S8** Calculated work functions for TM@C<sub>7</sub>N<sub>6</sub>.

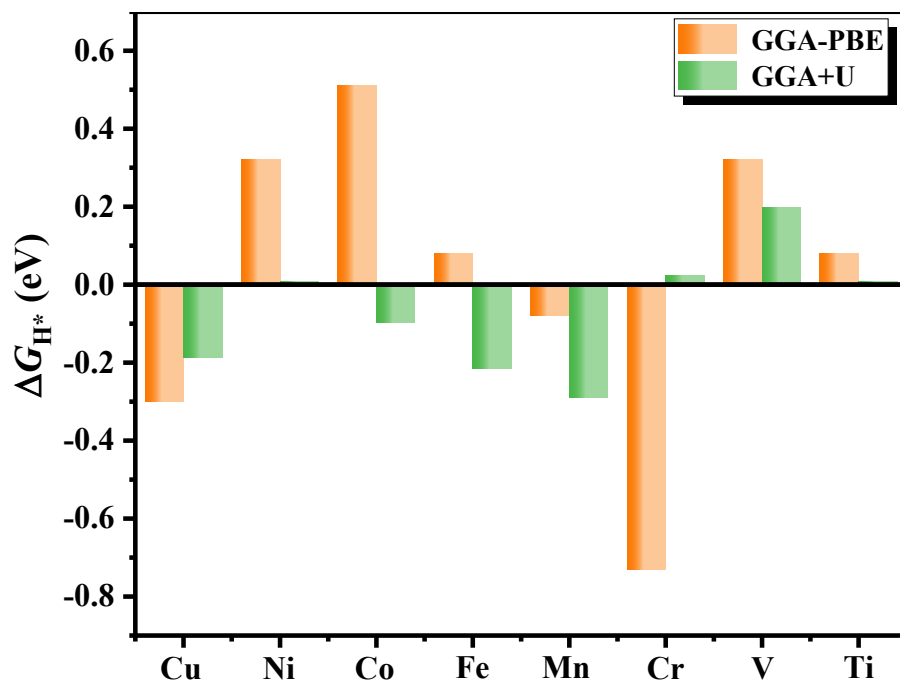

**Fig. S9** Comparison of the calculated  $\Delta G_{H^*}$  values for TM@C<sub>7</sub>N<sub>6</sub> using the GGA-PBE and GGA+U methods.

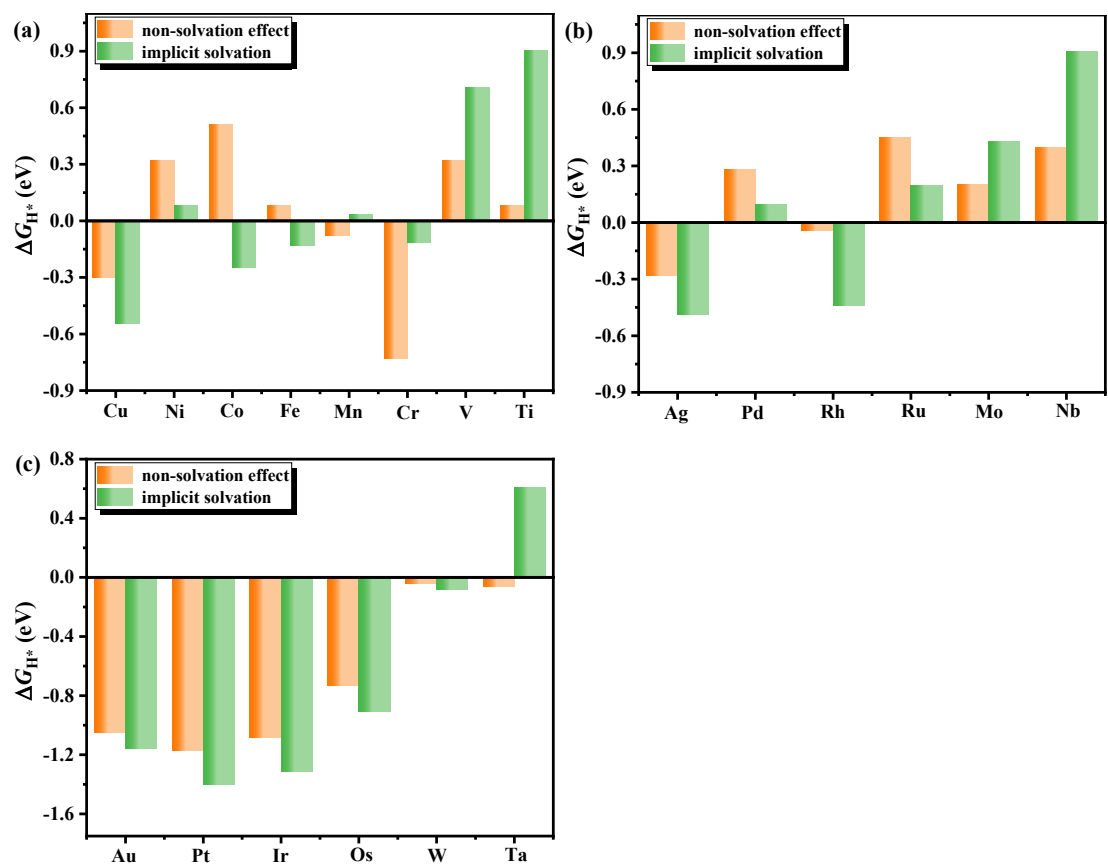

**Fig. S10** Comparison of the calculated  $\Delta G_{H^*}$  values for TM@C<sub>7</sub>N<sub>6</sub> with and without solvation effects.
